# Supplementary material for: A technology-assisted health coaching intervention vs. enhanced usual care for Primary Care-Based Obesity Treatment: a randomized controlled trial
Source: PubMed Central journal article supplement (PMC6360675; doi:10.1186/s40608-018-0226-0), 2019-02-04
Supplement: 40608_2018_226_MOESM1_ESM.pdf [file 40608_2018_226_MOESM1_ESM.pdf]

# HEALTH COACHING FIDELITY & SUPERVISION CHECKLIST

Date of Session:

Participant ID:

Rater's Initials:

Site:

Session Number:

Coach Initials:

DurationMin **1. How long was this session?** (write in the number) \_\_\_\_ minutes

Mode **2. Session Mode?**

\_\_ a) Baseline \_\_ b) Telephone

Met **3. Overall, do you feel that the objectives of the session were:** (circle)

\*Automatic calculation from Summary Scores 1-3 in Section 5: (Range 0-30)

**30 = Fully Met 25-29 = Mostly Met 20-24 = Partly Met 15-19 = Somewhat Met <15 = Not Met**

## 4. General Session characteristics

- Fixed \_\_ Participant was fixed on one topic (would not move on)  
OnTopic \_\_ Participant/group stayed on topic (minimal tangential conversation)  
Short \_\_ Participant had to cut the session short/group ended early  
Disruptive \_\_ Patient was disruptive  
Abusive \_\_ Patient was abusive  
PtInter \_\_ Interruptions (from patient's environment)  
StInter \_\_ Interruptions (from staff member's environment)  
Other \_\_ Other: \_\_\_\_\_

## 5. Session Core Elements

**KEY for Summary Scores 1-3 (should be no NAs for this section):**

**0: Did not cover** = this topic or focus point did not happen at all

**1: Partially covered** = this happened to some extent, but not completely

**2: Fully covered** = the goal was met fully

### Summary Score 1 (Baseline ONLY): Review – Baseline health coaching session

- Binder \_\_ a – Health Coach outlines content of the binder  
WeightLossGoal \_\_ b – Health Coach discusses weight loss goal  
NutritionGoal \_\_ c – Health Coach discusses nutrition goals (i.e. turns into SMART goal)  
PAGoal \_\_ d – Health Coach discusses physical activity goal (i.e. turns into SMART goal)  
Barriers \_\_ e – Health Coach discusses barriers to weight management  
Handouts \_\_ f – Health Coach refers to handouts to discuss weight management strategies and barriers  
Resources \_\_ g – Health Coach discusses intensive interventions (i.e. turns into SMART goal)  
SelfMonitor \_\_ h – Health Coach discusses self-monitoring tools (i.e. journaling, pedometer, smartphone apps)  
SummaryB \_\_ i – Health Coach summarizes session (i.e. reviews SMART goals, refer to PACT teams)  
FollowupB \_\_ j – Health Coach summarizes contact information and sets up follow-up appointments

### Summary Score 1 (Telephone ONLY): Review – Goal attainment and self-monitor check-in

- GoalAtt \_\_ a – Health Coach prompts review of goal attainment (i.e., review of goals *versus* actual)  
ResourcesUse \_\_ b – Health Coach determines use of resources (and/or discusses barriers) and collects usage data  
SelfMonitorUse \_\_ c – Health Coach determines use of self-monitoring tools (and/or discusses barriers) and collects usage data  
Succ/Fail \_\_ d – Health Coach discusses successes/failures (facilitators/barriers) since last session  
GoalUpdate \_\_ e – Health Coach initiates problem-solving approach when necessary to address barriers and update goals  
MTGnutrition \_\_ f – Health Coach updates response to MTG nutrition questions  
MTGphysical \_\_ g – Health Coach updates response to MTG physical activity questions  
Safety \_\_ h – Health Coach elicits any study or non-study related medical or adverse events from the participant  
SummaryT \_\_ i – Health Coach summarizes session (i.e. reviews new SMART goals)  
FollowupT \_\_ j – Health Coach sets up follow-up appointments

### Summary Score 2: Core Psycho-educational Content

- MotivInterv \_\_\_ a – Health Coach uses MI techniques to develop a self-management skills or change cognition  
Tailored \_\_\_ b – Health Coach tailors session by assessing knowledge of topic, degree of relevance to their weight management practices, and increasing knowledge/skills

### Summary Score 3: Action Planning and Session Wrap-up

- Goal \_\_\_ a – Health Coach prompts participant to identify SMART goals to work on before the next session  
Confidence \_\_\_ b – Health Coach assesses participant's motivation and self-confidence/readiness to follow-through on plan  
Agreement \_\_\_ d – Health Coach and participant come to agreement on small change goals

### KEY for Summary Scores 7-10:

**0: Did not demonstrate** = this process objective or component was not demonstrated at all

**1: Inconsistently Demonstrated** = this happened to some extent, but not all of the time

**2: Demonstrated consistently through entire session** = objective was demonstrated consistently and appropriately throughout the entire session

**9: NA**

### 7. Summary Score 4: Interventionist Personal Characteristics

- Didactic \_\_\_ Health Coach delivered didactic material in a matter of fact and friendly way  
Nonjudge \_\_\_ Health Coach avoided judgmental feedback on participant(s) contributions  
Empathy \_\_\_ Health Coach responded empathically and accurately to individual or group member behavior (verbal, nonverbal)

### 8. Summary Score 5: Session Structure

- Organized \_\_\_ Health Coach came prepared and organized  
Timing \_\_\_ Time was allocated appropriately in order to cover the appropriate content focus points for that session

### 9. Summary Score 6: Session Flow

- Process \_\_\_ Health Coach addressed process (tangential) issues but did not allow them to disrupt content agenda  
Modulation \_\_\_ Health Coach modulated distractions (e.g., side bar conversations, interruptions by family members)  
Delving \_\_\_ Health Coach avoided delving too deeply into psychological issues

### 10. Summary Score 7: Engagement with Patients

- Questions \_\_\_ Health Coach facilitated discussion and interaction using open-ended questions, affirmations, reflections, summaries  
Clarified \_\_\_ Health Coach elicits clarification of participant(s)' engagement by seeking feedback about didactic content

**11. What activities or additional topics were added to any aspect of the session? (Describe)**

**12. Additional Comments**
